# Supplementary material
Source: PubMed Central journal article supplement (PMC5241135)
Supplement: NIHMS813346-supplement-appendix_5.pdf [file NIHMS813346-supplement-appendix_5.pdf]

**Appendix V. Hazard Ratios for Hispanic Adults, United States 1998-2006**

|                                          | Model 1  | Model 2  | Model 3  | Model 4  |
|------------------------------------------|----------|----------|----------|----------|
| Duration of stay (15 or more years)      |          |          |          |          |
| Less than 5 years                        | 0.62 *   |          |          | 0.59 **  |
| 5–14 years                               | 0.88     |          |          | 0.85 †   |
| U.S.-born                                | 1.27 *** |          |          | 1.35 *** |
| Naturalized U.S. citizen                 |          |          | 1.19 **  | 0.94     |
| Male · Naturalized U.S. citizen          |          |          |          |          |
| Language of interview (English only)     |          |          |          |          |
| Spanish                                  |          | 1.01     |          | 1.18 **  |
| Dual language                            |          | 0.89 †   |          | 1.00     |
| Language unknown                         |          | 0.90     |          | 0.96     |
| National origin (Mexican)                |          |          |          |          |
| Puerto Rican                             | 1.21 *** | 1.14 †   | 1.09     | 1.27 **  |
| Cuban                                    | 1.16     | 1.00     | 1.02     | 1.12     |
| Other Hispanic                           | 0.83 **  | 0.77 **  | 0.78 *** | 0.83 **  |
| Male (female)                            | 1.57 *** | 1.56 *** | 1.57 *** | 1.56 *** |
| Schooling (more than high school degree) |          |          |          |          |
| Less than high school                    | 1.31 *** | 1.23 **  | 1.27 *** | 1.27 *** |
| High school degree                       | 1.19 *   | 1.19 *   | 1.19 *   | 1.19 *   |
| Unknown schooling                        | 0.94     | 0.88     | 0.91     | 0.93     |
| Below poverty line                       | 1.25 *** | 1.23 *** | 1.24 *** | 1.23 *** |
| Missing                                  | 1.00     | 1.00     | 1.00     | 1.00     |
| Homeowner                                | 0.83 *** | 0.87 **  | 0.85 **  | 0.83 *** |
| Smoking status                           |          |          |          |          |
| Former smoker                            | 1.28 *** | 1.28 **  | 1.28 *** | 1.28     |
| Current smoker                           | 1.76 **  | 1.81 *** | 1.81 **  | 1.76     |
| Missing                                  | 2.51 **  | 2.49 **  | 2.50 **  | 2.54     |
| Drinking status (never drinker)          |          |          |          |          |
| Former drinker                           | 1.32 **  | 1.35 **  | 1.35 **  | 1.33 **  |
| Current light/moderate drinker           | 0.78 **  | 0.79 **  | 0.79 **  | 0.79 **  |
| Current heavy drinker                    | 1.61 *   | 1.67 *   | 1.66 *   | 1.62 *   |
| Missing                                  | 0.62     | 0.65     | 0.64     | 0.65     |

**Appendix V. Hazard Ratios for Hispanic Adults, United States 1998-2006**

|                                    | Model 1 | Model 2 | Model 3 | Model 4 |
|------------------------------------|---------|---------|---------|---------|
| Body Mass Index ("healthy" weight) |         |         |         |         |
| Underweight                        | 1.35    | 1.29    | 1.33    | 1.33    |
| Overweight                         | 0.86 *  | 0.86 *  | 0.86 †  | 0.85 *  |
| Obese class 1                      | 0.88    | 0.89    | 0.90    | 0.88    |
| Obese class 2                      | 1.03    | 1.07    | 1.05    | 1.03    |
| Obese class 3                      | 1.26 *  | 1.24 *  | 1.24 *  | 1.24 *  |
| Not in adult sample                | 1.21 *  | 1.21 *  | 1.21 *  | 1.22    |

Source: 1998-2004 National Health Interview Surveys Linked Mortality File through 2006.

Note: referent in parentheses.

N=73,369 (2,234 deaths) for all models.

†  $p \leq .10$ . \*  $p \leq .05$  \*\*  $p \leq .01$  \*\*\*  $p \leq .001$
